# Supplementary material for: The Morphology of Ice and Liquid Brine in the Environmental SEM: AStudy of the Freezing Methods
Source: Copernicus journal article supplement (doi:10.5194/tc-2019-13), 2019-03-06
Supplement: Supplementary file 1 [file tc-2019-13-supplement.zip]

Archive with 2 entries (2 files):
- Location of impurities in ice_SI.pdf
- SI_17.pdf
